# Supplementary material for: Determination of major and trace elements in geological samples by laser ablation solution sampling-inductively coupled plasma mass spectrometry
Source: Royal Society of Chemistry journal article supplement (doi:10.1039/c9ja00027e), 2019-01-01
Supplement: c9ja00027e1.pdf [file c9ja00027e1.pdf]

## **Electronic Supplementary Information**

# **Determination of Major and Trace Elements in Geological Samples by Laser Ablation Solution Sampling-Inductively Coupled Plasma Mass Spectrometry**

Xiuhong Liao, Zhaochu Hu,\* Tao Luo, Wen Zhang, Yongsheng Liu, Keqing Zong,

Lian Zhou, Junfeng Zhang

*State Key Laboratory of Geological Processes and Mineral Resources, China*

*University of Geosciences, Wuhan, 430074, PR China*

\*Author to whom correspondence should be sent.

\*E-mail: [zchu@vip.sina.com](mailto:zchu@vip.sina.com); [zhaochuhu@hotmail.com](mailto:zhaochuhu@hotmail.com)

Tel.: +86 27 61055600, Fax: +86 27 67885

## Contents

**Figure S1.** Time-resolved signals of  ${}^7\text{Li}$ ,  ${}^{25}\text{Mg}$ ,  ${}^{45}\text{Sc}$ ,  ${}^{109}\text{Ag}$ ,  ${}^{139}\text{La}$  and  ${}^{238}\text{U}$  in the ablation of (a) a multi-element solution with all elements in the concentration of  $0.1 \mu\text{g ml}^{-1}$  and (b) NIST SRM 610 silicate glass, in which the elements concentration are 400 to  $500 \mu\text{g g}^{-1}$ . Both samples were ablated by static ablation and other conditions cited in Table 1.

**Table S1.** Isotopes selected for the determination and limits of detection (LOD) for LA-ICP-MS analysis of the solution sample.

**Table S2.** Determination of forty-five elements in six international geological reference materials by laser ablation solution sampling ICP-MS.

## Calculation for limits of detection

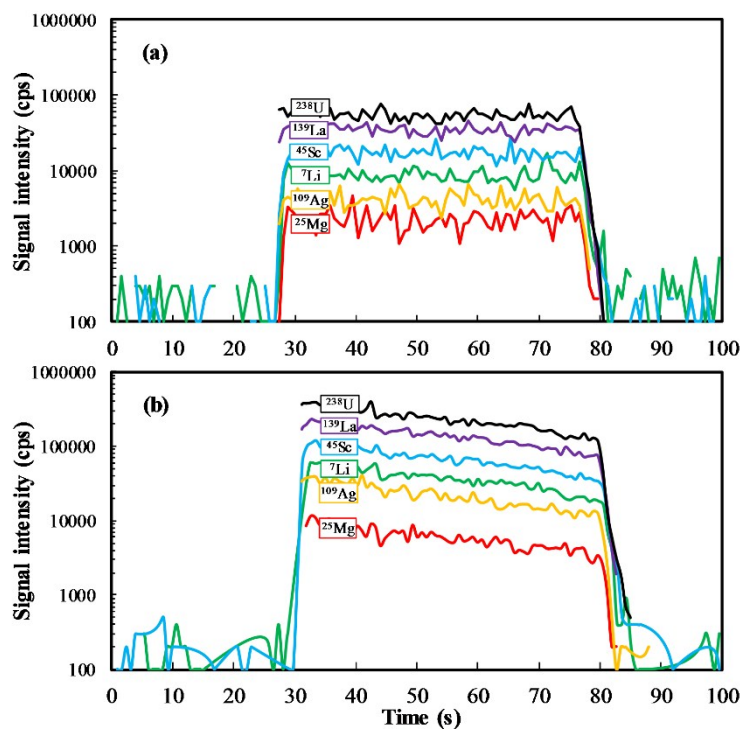

**Fig. S1.** Time-resolved signals of  $^7\text{Li}$ ,  $^{25}\text{Mg}$ ,  $^{45}\text{Sc}$ ,  $^{109}\text{Ag}$ ,  $^{139}\text{La}$  and  $^{238}\text{U}$  in the ablation of (a) a multi-element solution with all elements in the concentration of  $0.1 \mu\text{g ml}^{-1}$  and (b) NIST SRM 610 silicate glass, in which the elements concentration are 400 to  $500 \mu\text{g g}^{-1}$ . Both samples were ablated by static ablation and other conditions cited in Table 1.

**Table. S1.** Isotopes selected for the determination and limits of detection (LOD) for LA-ICP-MS analysis of the solution sample.

| <b>Element</b> | <b>Analytical mass</b> | <b>Isotope Abundance(%)</b> | <b>LOD (ng g<sup>-1</sup>)</b> | <b>Element</b> | <b>Analytical mass</b> | <b>Isotope Abundance(%)</b> | <b>LOD (ng g<sup>-1</sup>)</b> |
|----------------|------------------------|-----------------------------|--------------------------------|----------------|------------------------|-----------------------------|--------------------------------|
| <b>Li</b>      | 7                      | 92.41                       | 0.956                          | <b>In</b>      | 115                    | 95.71                       | 0.165                          |
| <b>Na</b>      | 23                     | 100.00                      | 2.899                          | <b>Cs</b>      | 133                    | 100.00                      | 0.744                          |
| <b>Mg</b>      | 25                     | 10.00                       | 0.563                          | <b>Ba</b>      | 137                    | 11.23                       | 0.170                          |
| <b>Al</b>      | 27                     | 100.00                      | 1.140                          | <b>La</b>      | 139                    | 99.91                       | 0.026                          |
| <b>K</b>       | 39                     | 93.26                       | 15.09                          | <b>Ce</b>      | 140                    | 88.45                       | 0.032                          |
| <b>Ca</b>      | 42                     | 0.65                        | 64.11                          | <b>Pr</b>      | 141                    | 100.00                      | 0.017                          |
| <b>Sc</b>      | 45                     | 100.00                      | 0.339                          | <b>Nd</b>      | 146                    | 17.20                       | 0.083                          |
| <b>Ti</b>      | 47                     | 7.44                        | 1.779                          | <b>Sm</b>      | 147                    | 14.99                       | 0.098                          |
| <b>V</b>       | 51                     | 99.75                       | 0.243                          | <b>Eu</b>      | 153                    | 52.19                       | 0.045                          |
| <b>Cr</b>      | 52                     | 83.79                       | 2.118                          | <b>Gd</b>      | 158                    | 24.84                       | 0.058                          |
| <b>Mn</b>      | 55                     | 100.00                      | 1.382                          | <b>Tb</b>      | 159                    | 100.00                      | 0.016                          |
| <b>Fe</b>      | 57                     | 2.12                        | 16.18                          | <b>Dy</b>      | 163                    | 24.90                       | 0.058                          |
| <b>Co</b>      | 59                     | 100.00                      | 0.155                          | <b>Ho</b>      | 165                    | 100.00                      | 0.023                          |
| <b>Ni</b>      | 60                     | 26.22                       | 13.67                          | <b>Er</b>      | 166                    | 33.61                       | 0.094                          |
| <b>Cu</b>      | 63                     | 69.17                       | 0.899                          | <b>Tm</b>      | 169                    | 100.00                      | 0.021                          |
| <b>Zn</b>      | 66                     | 27.90                       | 0.550                          | <b>Yb</b>      | 173                    | 21.83                       | 0.106                          |
| <b>Ga</b>      | 71                     | 39.89                       | 0.575                          | <b>Lu</b>      | 175                    | 97.41                       | 0.037                          |
| <b>Rb</b>      | 85                     | 72.17                       | 1.999                          | <b>Hf</b>      | 178                    | 27.28                       | 0.043                          |
| <b>Sr</b>      | 88                     | 82.58                       | 0.063                          | <b>Ta</b>      | 181                    | 99.99                       | 0.023                          |
| <b>Y</b>       | 89                     | 100.00                      | 0.111                          | <b>Tl</b>      | 205                    | 70.50                       | 0.044                          |
| <b>Zr</b>      | 91                     | 11.22                       | 0.382                          | <b>Pb</b>      | 208                    | 52.40                       | 0.069                          |
| <b>Nb</b>      | 93                     | 100.00                      | 0.080                          | <b>Th</b>      | 232                    | 100.00                      | 0.042                          |
| <b>Mo</b>      | 97                     | 9.55                        | 0.274                          | <b>U</b>       | 238                    | 99.27                       | 0.024                          |

**Table. S2.** Determination of forty-five elements in six international geological reference materials by laser ablation solution sampling ICP-MS.

| Element                                 | Unit | BCR-2            |            |           | BHVO-2           |            |           | W-2A             |            |           |
|-----------------------------------------|------|------------------|------------|-----------|------------------|------------|-----------|------------------|------------|-----------|
|                                         |      | Liquid<br>(n=11) | RSD<br>(%) | Ref value | Liquid<br>(n=11) | RSD<br>(%) | Ref value | Liquid<br>(n=11) | RSD<br>(%) | Ref value |
| Li (7)                                  | ppm  | 9.26             | 3.4        | 9.13      | 4.43             | 6.5        | 4.5       | 9.28             | 2.2        | 9.6       |
| Na <sub>2</sub> O (23)                  | wt%  | 3.06             | 3.6        | 3.12      | 2.19             | 5.5        | 2.219     | 2.02             | 2.5        | 2.21      |
| MgO (25)                                | wt%  | 3.27             | 1.4        | 3.599     | 6.29             | 4.8        | 6.8       | 5.68             | 3.5        | 6.24      |
| Al <sub>2</sub> O <sub>3</sub> (27)     | wt%  | 14.3             | 2.0        | 13.48     | 14.2             | 2.7        | 13.44     | 15.2             | 3.8        | 15.45     |
| K <sub>2</sub> O (39)                   | wt%  | 1.92             | 3.2        | 1.83      | 0.52             | 5.8        | 0.513     | 0.68             | 1.2        | 0.63      |
| CaO (42)                                | wt%  | 7.23             | 2.5        | 7.114     | 10.4             | 2.8        | 11.4      | 10.5             | 2.7        | 11.04     |
| Sc (45)                                 | ppm  | 32.7             | 3.1        | 33.53     | 29.8             | 3.1        | 31.83     | 32.3             | 1.6        | 35        |
| TiO <sub>2</sub> (47)                   | wt%  | 2.04             | 3.8        | 2.265     | 2.14             | 3.7        | 2.731     | 1.00             | 4.8        | 1.078     |
| V (51)                                  | ppm  | 422              | 1.9        | 417.6     | 317              | 4.1        | 318.2     | 264              | 2.6        | 262       |
| Cr (53)                                 | ppm  | 16.8             | 10         | 15.85     | 293              | 5.1        | 287.2     | 90.8             | 3.4        | 87        |
| MnO (55)                                | wt%  | 0.20             | 2.0        | 0.1966    | 0.16             | 3.8        | 0.169     | 0.17             | 3.5        | 0.166     |
| Fe <sub>2</sub> O <sub>3</sub> (t) (57) | wt%  | 13.4             | 2.9        | 13.77     | 12.7             | 4.0        | 12.39     | 9.94             | 3.2        | 10.54     |
| Co (59)                                 | ppm  | 37.4             | 2.2        | 37.33     | 45.7             | 3.9        | 44.89     | 44.9             | 1.3        | 45        |
| Ni (60)                                 | ppm  | 12.7             | 6.8        | 12.57     | 126              | 5.6        | 119.8     | 74.9             | 3.6        | 70        |
| Cu (63)                                 | ppm  | 20.5             | 6.1        | 19.66     | 125              | 5.7        | 129.3     | 109              | 4.3        | 104       |
| Zn (66)                                 | ppm  | 131              | 4.5        | 129.5     | 99.8             | 5.9        | 103.9     | 75.9             | 4.4        | 79        |
| Ga (71)                                 | ppm  | 22.4             | 3.7        | 22.07     | 21.9             | 4.9        | 21.37     | 18.0             | 5.1        | 17        |
| Rb (85)                                 | ppm  | 46.5             | 3.5        | 46.02     | 9.37             | 5.5        | 9.261     | 20.0             | 4.5        | 19        |
| Sr (88)                                 | ppm  | 335              | 1.9        | 337.4     | 359              | 4.8        | 394.1     | 193              | 3.2        | 194       |
| Y (89)                                  | ppm  | 36.1             | 1.6        | 36.07     | 24.5             | 4.7        | 25.91     | 20.9             | 2.4        | 19.5      |
| Zr (91)                                 | ppm  | 178              | 2.4        | 186.5     | 155              | 6.1        | 169       | 83.8             | 4.0        | 84        |
| Nb (93)                                 | ppm  | 11.1             | 5.3        | 11.2      | 15.9             | 4.6        | 16.95     | 5.99             | 5.0        | 6.4       |
| Mo (97)                                 | ppm  | 246              | 5.1        | 250.6     | 3.41             | 4.1        | 3.5       | 0.43             | 17.8       | 0.46      |
| Cs (133)                                | ppm  | 1.10             | 5.5        | 1.16      | 0.10             | 15         | 0.0996    | 0.98             | 10.2       | 0.93      |
| Ba (137)                                | ppm  | 679              | 2.4        | 683.9     | 130              | 4.4        | 130.9     | 171              | 4.0        | 172.74    |
| La (139)                                | ppm  | 25.6             | 1.0        | 25.08     | 15.3             | 4.9        | 15.2      | 10.7             | 4.2        | 10.71     |
| Ce (140)                                | ppm  | 53.9             | 2.5        | 53.12     | 38.2             | 3.1        | 37.53     | 23.3             | 3.0        | 23.24     |
| Pr (141)                                | ppm  | 6.90             | 1.7        | 6.827     | 5.46             | 4.5        | 5.339     | 3.15             | 4.1        | 3.01      |
| Nd (143)                                | ppm  | 29.4             | 2.5        | 28.26     | 24.0             | 5.9        | 24.27     | 13.4             | 7.3        | 13.08     |
| Sm (147)                                | ppm  | 6.78             | 4.7        | 6.547     | 6.66             | 6.5        | 6.023     | 3.24             | 9.3        | 3.29      |
| Eu (153)                                | ppm  | 1.98             | 5.2        | 1.989     | 2.14             | 5.9        | 2.043     | 1.14             | 5.8        | 1.11      |
| Gd (155)                                | ppm  | 7.03             | 4.6        | 6.811     | 6.47             | 6.8        | 6.207     | 3.64             | 4.3        | 3.74      |
| Tb (159)                                | ppm  | 1.04             | 5.2        | 1.077     | 0.92             | 7.0        | 0.94      | 0.62             | 5.1        | 0.61      |

**Continued Table. S2**

| Element<br>( $\mu\text{g g}^{-1}$ ) | Unit | BCR-2            |            |           | BHVO-2           |            |           | W-2A             |            |           |
|-------------------------------------|------|------------------|------------|-----------|------------------|------------|-----------|------------------|------------|-----------|
|                                     |      | Liquid<br>(n=11) | RSD<br>(%) | Ref value | Liquid<br>(n=11) | RSD<br>(%) | Ref value | Liquid<br>(n=11) | RSD<br>(%) | Ref value |
| Dy (163)                            | ppm  | 6.41             | 4.0        | 6.424     | 5.23             | 5.9        | 5.28      | 3.83             | 5.7        | 3.83      |
| Ho (165)                            | ppm  | 1.31             | 6.1        | 1.313     | 0.97             | 5.6        | 0.9887    | 0.75             | 6.8        | 0.78      |
| Er (166)                            | ppm  | 3.73             | 4.0        | 3.67      | 2.38             | 6.2        | 2.511     | 2.11             | 7.2        | 2.22      |
| Tm (169)                            | ppm  | 0.53             | 6.2        | 0.5341    | 0.31             | 4.7        | 0.3349    | 0.33             | 5.5        | 0.32      |
| Yb (173)                            | ppm  | 3.43             | 6.9        | 3.392     | 1.83             | 5.6        | 1.994     | 1.88             | 7.8        | 1.94      |
| Lu (175)                            | ppm  | 0.52             | 5.9        | 0.5049    | 0.23             | 6.8        | 0.2754    | 0.28             | 6.4        | 0.29      |
| Hf (178)                            | ppm  | 4.62             | 4.2        | 4.972     | 4.04             | 4.8        | 4.1       | 2.57             | 6.9        | 2.46      |
| Ta (181)                            | ppm  | 0.87             | 5.3        | 0.8       | 1.24             | 6.2        | 1.154     | 0.49             | 5.8        | 0.46      |
| Tl (205)                            | ppm  | 0.25             | 5.5        | 0.267     |                  |            | 0.0224    | 0.09             | 13         | 0.1       |
| Pb (208)                            | ppm  | 10.4             | 2.3        | 10.59     | 1.62             | 5.9        | 1.653     | 9.00             | 5.0        | 9         |
| Th (232)                            | ppm  | 6.09             | 2.4        | 5.828     | 1.18             | 8.7        | 1.224     | 2.04             | 4.8        | 2.19      |
| U (238)                             | ppm  | 1.70             | 4.4        | 1.683     | 0.41             | 4.7        | 0.412     | 0.49             | 5.7        | 0.51      |

Continued Table. S2

| Element<br>( $\mu\text{g} / \text{g}$ ) | Unit | GSP-2            |            |           | AGV-2            |            |           | RGM-2            |            |           |
|-----------------------------------------|------|------------------|------------|-----------|------------------|------------|-----------|------------------|------------|-----------|
|                                         |      | Liquid<br>(n=11) | RSD<br>(%) | Ref value | Liquid<br>(n=11) | RSD<br>(%) | Ref value | Liquid<br>(n=11) | RSD<br>(%) | Ref value |
| Li (7)                                  | ppm  | 36.7             | 3.2        | 36        | 11.3             | 3.1        | 10.8      | 57.3             | 2.2        | 58.1      |
| Na2O (23)                               | wt%  | 2.72             | 2.9        | 2.78      | 4.21             | 3.4        | 4.204     | 3.81             | 4.4        | 3.89      |
| MgO (25)                                | wt%  | 0.91             | 4.0        | 0.96      | 1.66             | 3.1        | 1.8       | 0.24             | 1.8        | 0.25      |
| Al2O3 (27)                              | wt%  | 15.4             | 2.2        | 14.9      | 17.9             | 4.6        | 17.03     | 13.4             | 5.5        | 14.3      |
| K2O (39)                                | wt%  | 5.37             | 3.9        | 5.38      | 2.19             | 6.2        | 2.898     | 4.24             | 6.2        | 4.2       |
| CaO (42)                                | wt%  | 2.13             | 3.4        | 2.1       | 5.19             | 2.7        | 5.15      | 1.24             | 5.9        | 1.29      |
| Sc (45)                                 | ppm  | 6.86             | 4.4        | 6.3       | 12.8             | 2.2        | 13.11     | 5.31             | 2.5        | 4.89      |
| TiO2 (47)                               | wt%  | 0.61             | 3.3        | 0.66      | 0.91             | 3.1        | 1.051     | 0.21             | 3.5        | 0.28      |
| V (51)                                  | ppm  | 52.8             | 2.9        | 52        | 118              | 4.4        | 118.5     | 11.5             | 4.3        | 12        |
| Cr (53)                                 | ppm  | 19.8             | 5.5        | 20        | 17.6             | 5.9        | 16.22     | 3.71             | 6.1        | 4         |
| MnO (55)                                | wt%  | 0.04             | 2.4        | 0.038     | 0.11             | 3.5        | 0.1004    | 0.03             | 3.4        | 0.037     |
| Fe2O3(t) (57)                           | wt%  | 4.36             | 2.0        | 4.9       | 6.09             | 3.0        | 6.69      | 1.62             | 3.5        | 1.76      |
| Co (59)                                 | ppm  | 7.51             | 2.9        | 7.3       | 15.5             | 4.0        | 15.46     | 1.82             | 5.0        | 1.98      |
| Ni (60)                                 | ppm  | 17.0             | 6.5        | 17        | 19.3             | 7.1        | 18.87     | 2.40             | 23         | 2.5       |
| Cu (63)                                 | ppm  | 51.4             | 2.3        | 47        | 51.2             | 5.1        | 51.51     | 9.51             | 4.6        | 9.95      |
| Zn (66)                                 | ppm  | 118              | 5.3        | 120       | 91.9             | 4.6        | 86.7      | 34.4             | 5.0        | 35        |
| Ga (71)                                 | ppm  | 23.2             | 3.6        | 22        | 20.5             | 6.3        | 20.42     | 16.4             | 4.8        | 16.1      |
| Rb (85)                                 | ppm  | 239              | 3.4        | 245       | 67.3             | 2.3        | 68.6      | 145              | 2.8        | 149       |
| Sr (88)                                 | ppm  | 236              | 3.8        | 240       | 628              | 1.4        | 659.5     | 105              | 2.6        | 107       |
| Y (89)                                  | ppm  | 25.8             | 2.9        | 28        | 19.1             | 4.3        | 19.14     | 22.9             | 3.0        | 21.8      |
| Zr (91)                                 | ppm  | 508              | 3.6        | 550       | 215              | 4.8        | 230       | 219              | 3.9        | 223       |
| Nb (93)                                 | ppm  | 24.7             | 5.2        | 27        | 13.1             | 7.0        | 14.12     | 8.08             | 3.1        | 8.6       |
| Mo (97)                                 | ppm  | 1.98             | 9.3        | 2.1       | 1.93             | 6.7        | 2         | 2.32             | 9.4        | 2.3       |
| Cs (133)                                | ppm  | 1.22             | 3.2        | 1.2       | 1.15             | 3.8        | 1.173     | 9.61             | 2.2        | 9.83      |
| Ba (137)                                | ppm  | 1329             | 2.5        | 1340      | 1091             | 4.8        | 1134      | 777              | 2.5        | 812       |
| La (139)                                | ppm  | 181              | 3.9        | 180       | 39.9             | 3.1        | 38.21     | 23.2             | 3.5        | 22.5      |
| Ce (140)                                | ppm  | 442              | 4.1        | 410       | 73.2             | 4.3        | 69.43     | 44.7             | 3.4        | 45.1      |
| Pr (141)                                | ppm  | 54.7             | 3.4        | 51        | 8.67             | 4.4        | 8.165     | 5.30             | 4.2        | 5.12      |
| Nd (143)                                | ppm  | 204              | 1.4        | 200       | 29.9             | 2.5        | 30.49     | 19.1             | 5.9        | 19.1      |
| Sm (147)                                | ppm  | 26.1             | 3.4        | 27        | 5.60             | 3.7        | 5.509     | 4.04             | 6.8        | 4.05      |
| Eu (153)                                | ppm  | 2.28             | 5.3        | 2.3       | 1.65             | 5.6        | 1.553     | 0.63             | 5.2        | 0.65      |
| Gd (155)                                | ppm  | 12.5             | 2.9        | 12        | 4.91             | 4.5        | 4.678     | 3.98             | 6.7        | 3.84      |
| Tb (159)                                | ppm  | 1.21             | 6.8        | 1.2       | 0.62             | 5.2        | 0.64      | 0.57             | 4.5        | 0.57      |
| Dy (163)                                | ppm  | 5.81             | 3.9        | 6.1       | 3.55             | 3.3        | 3.549     | 3.84             | 5.1        | 3.63      |
| Ho (165)                                | ppm  | 0.96             | 5.7        | 1         | 0.72             | 4.6        | 0.6818    | 0.74             | 4.3        | 0.75      |
| Er (166)                                | ppm  | 2.41             | 3.4        | 2.43      | 1.86             | 4.6        | 1.825     | 2.39             | 4.8        | 2.32      |
| Tm (169)                                | ppm  | 0.29             | 6.6        | 0.29      | 0.25             | 6.8        | 0.2623    | 0.35             | 6.6        | 0.35      |

**Continued Table. S2**

| Element<br>( $\mu\text{g} / \text{g}$ ) | Unit | GSP-2            |            |           | AGV-2            |            |           | RGM-2            |            |           |
|-----------------------------------------|------|------------------|------------|-----------|------------------|------------|-----------|------------------|------------|-----------|
|                                         |      | Liquid<br>(n=11) | RSD<br>(%) | Ref value | Liquid<br>(n=11) | RSD<br>(%) | Ref value | Liquid<br>(n=11) | RSD<br>(%) | Ref value |
| Yb (173)                                | ppm  | 1.62             | 6.7        | 1.6       | 1.75             | 4.2        | 1.653     | 2.50             | 5.1        | 2.56      |
| Lu (175)                                | ppm  | 0.22             | 6.5        | 0.23      | 0.26             | 3.6        | 0.2507    | 0.38             | 5.7        | 0.4       |
| Hf (178)                                | ppm  | 13.5             | 5.5        | 14        | 5.18             | 1.3        | 5.137     | 5.89             | 3.4        | 5.87      |
| Ta (181)                                | ppm  | 0.81             | 5.4        | 0.83      | 0.78             | 6.2        | 0.865     | 0.87             | 5.7        | 0.83      |
| Tl (205)                                | ppm  | 1.34             | 6.0        | 1.32      | 0.25             | 6.7        | 0.27      | 2.01             | 6.0        | 1.93      |
| Pb (208)                                | ppm  | 51.5             | 2.5        | 49.8      | 13.9             | 3.2        | 13.14     | 20.5             | 4.9        | 20.1      |
| Th (232)                                | ppm  | 109              | 4.3        | 105       | 6.34             | 4.3        | 6.174     | 14.2             | 4.3        | 14.6      |
| U (238)                                 | ppm  | 2.51             | 3.6        | 2.4       | 1.93             | 4.7        | 1.885     | 5.41             | 2.5        | 5.37      |

All of the reference values were taken from the GEOREM database

(<http://georem.mpch-mainz.gwdg.de/>).



### Calculation for limits of detection

The limits of detection were calculated according to Longerich et al.<sup>1</sup> and as follows:

$$\sigma_{net} = \sigma_{individual} \sqrt{\frac{1}{n_b} + \frac{1}{n_a}}$$

$$\sigma_{net} \approx \sigma_{individual} \sqrt{\frac{2}{n}}$$

$$LOD = \frac{3\sigma_{net}}{S}$$

where  $n_a$  is the number of slices in the ablation time interval that are integrated,  $n_b$  is the number of slices in the background time interval that are integrated, and in this research,  $n \approx n_a \approx n_b = 50$ .  $\sigma_{individual}$  refers to standard deviation of the count rate in individual measurements for background.  $\sigma_{net}$  refers to the standard deviation of the net count rate for an analyte in the data acquisition.  $S$  refers to sensitivity of the analyte.

### Reference

1. H. P. Longerich, S. E. Jackson and D. Günther, *J. Anal. At. Spectrom.*, 1996, **11**, 899-904.
